# Supplementary material for: The Effect of Sex-Specific Differences on IL-10−/− Mouse Colitis Phenotype and Microbiota
Source: MDPI journal article supplement (doi:10.3390/ijms241210364), 2023-06-20

**Title:**

Sex-specific difference on IL-10<sup>-/-</sup> mice colitis phenotype and microbiota

**Authors:**

Maite Casado-Bedmar, Maryline Roy and Emilie Viennois \*

**Affiliations:**

INSERM, U1149, Center of Research on Inflammation, Université de Paris, Paris, 75018, France

**\*Correspondence:** emilie.viennois@inserm.fr (E.V.)

**ORCID iD:**

M.C-B. 0000-0003-0569-6361

E.V. 0000-0002-3104-620X

**Supplementary Figure S1. Histological analysis of colonic samples of IL-10<sup>-/-</sup> mice.**

Representative images of the histopathological score of H&E stained colonic samples of male (♂) and female (♀) IL-10<sup>-/-</sup> mice during severe colitis at 17 weeks of age. Scale bar = 250 μm.

**Supplementary Figure S2. Taxonomy showing the dysbiosis associated with colitis in IL-10<sup>-/-</sup> mice.** Taxonomic relative abundance at specie level (level 7) for both females and males before colitis (day 0) and during severe colitis (day 91) from fecal samples of IL-10<sup>-/-</sup> mice.

**Supplementary Figure S3. Correlation matrix summarizing all the most relevant variables tested in IL-10<sup>-/-</sup> mice after 91 days of follow-up, 17 weeks of age.** Analysis performed per sex using the Spearman correlation coefficient R, with R = 1 (positive correlation) and R = -1 (negative correlation) displayed with blue or orange, respectively. W/L: weight/length ratio; W/BW: weight/body weight ratio; LPCN-2: fecal lipocalin-2; MPO: colonic myeloperoxidase; TNF: tumor necrosis factor; IL: interleukin; FLGN: flagellin, LPS: lipopolysaccharides; Akkermansia mun.: fecal *Akkermansia muciniphila* at day 91.

Supplementary Figure S1.

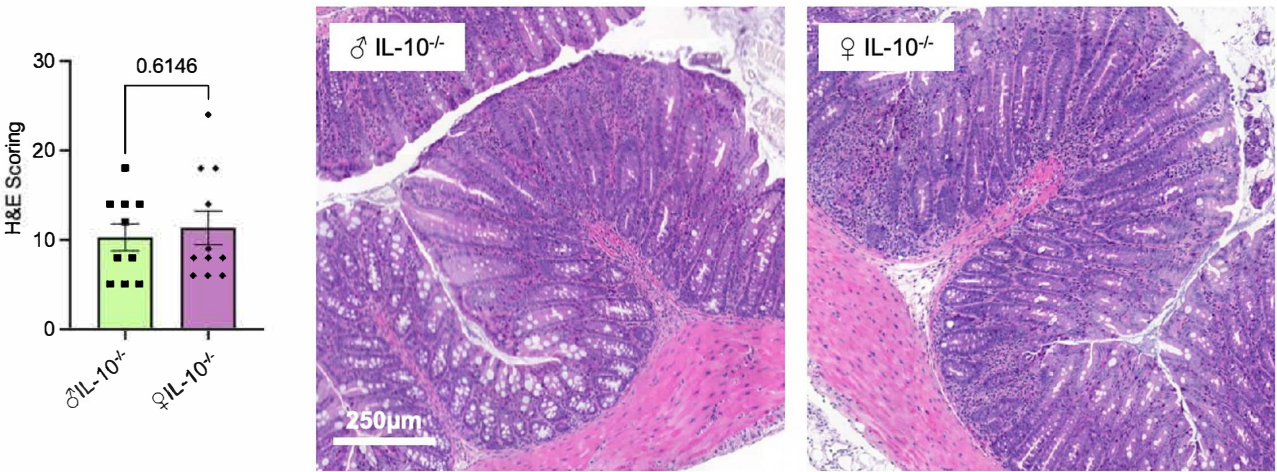

# Supplementary Figure S2.

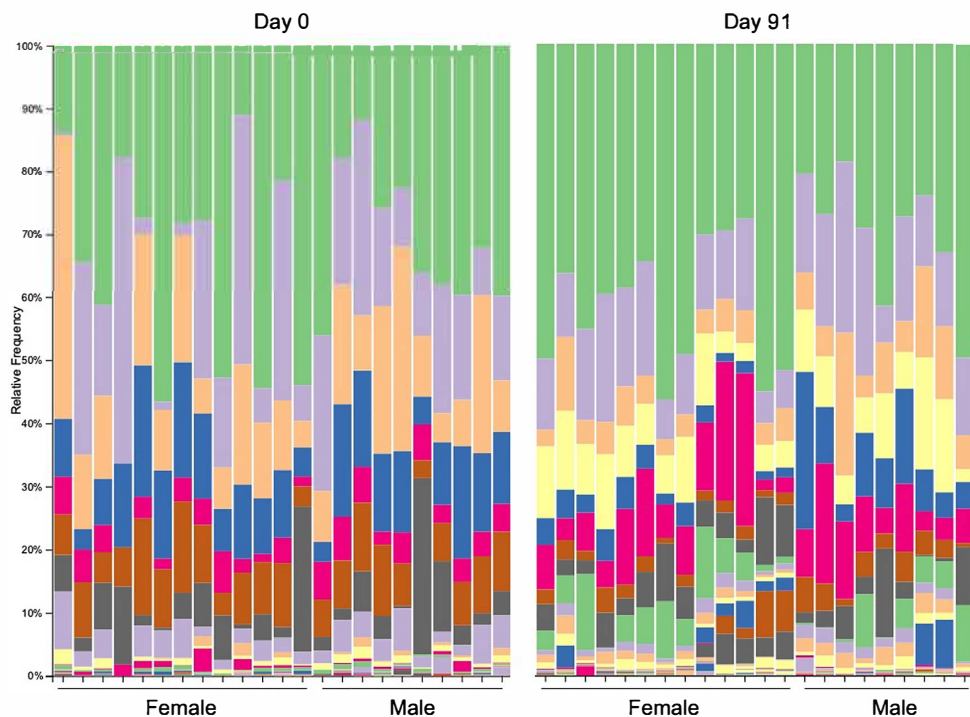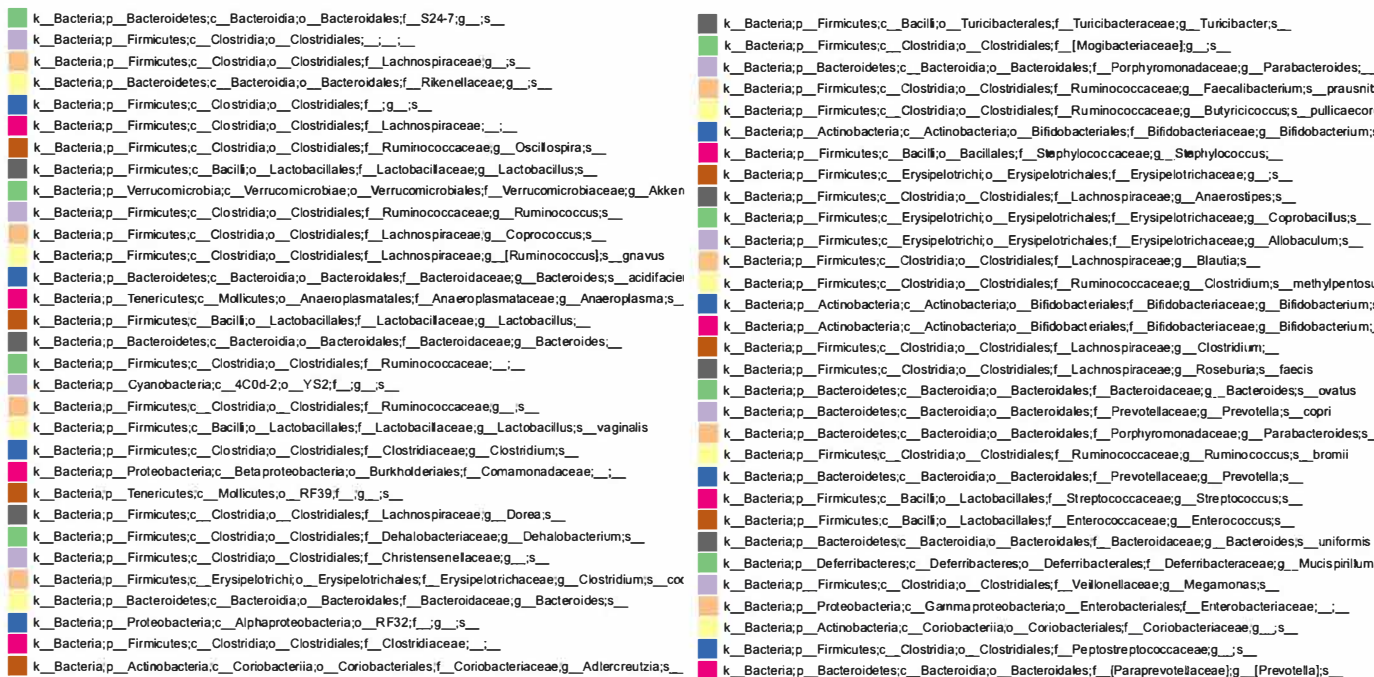

Supplementary Figure S3.

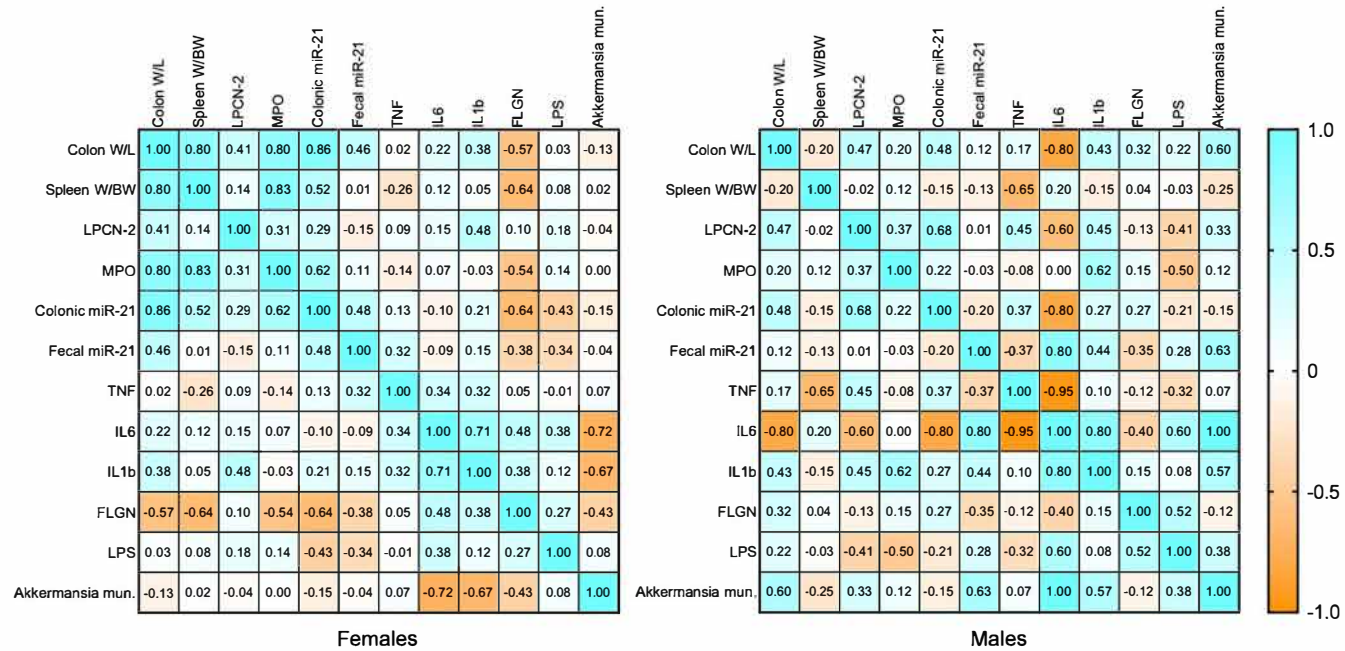

Supplement: s1 [file s1]
